# Supplementary material for: Main-group indium single-atom catalysts for electrocatalytic NO reduction to NH3
Source: Royal Society of Chemistry journal article supplement (doi:10.1039/d3ta00606a), 2023-01-01
Supplement: d3ta00606a1.pdf [file d3ta00606a1.pdf]

## Experimental Section

### Synthesis of In<sub>1/a</sub>-MoO<sub>3</sub>

All the chemicals are of analytical grade and used as received. In a typical procedure, 10 mg InCl<sub>3</sub>, 50 mg of MoO<sub>3</sub> and 100 mg of C<sub>2</sub>H<sub>2</sub>O<sub>4</sub>·2H<sub>2</sub>O were dispersed into 30 mL distilled water under stirring at 90 °C for 2 h. The mixture was then subjected to supercritical CO<sub>2</sub> treatment at 180 °C under the pressure of 10 MPa for 6 h[1]. After treatment, the resulting products were collected by centrifuging, washing with deionized water/ethanol several times, and drying at 60 °C overnight, obtaining In<sub>1/a</sub>-MoO<sub>3</sub>. Bare a-MoO<sub>3</sub> was by the same procedure without addition of InCl<sub>3</sub>.

### Electrochemical experiments

Electrochemical measurements were performed on a CHI-660E electrochemical workstation using a conventional three-electrode cell. The catalyst coated on carbon cloth (CC, 0.5 mg cm<sup>-2</sup>) was used as the working electrode, Ag/AgCl (saturated KCl) electrode was used as the reference electrode, and graphite rod was used as the counter electrode. All potentials were referenced to reversible hydrogen electrode (RHE) by following equation:  $E_{\text{RHE}} \text{ (V)} = E_{\text{Ag/AgCl}} + 0.198 + 0.059 \times \text{pH}$ . Electrochemical NORR tests were performed in 0.5 M Na<sub>2</sub>SO<sub>4</sub> solution using an gas-tight H-type cell separated by a Nafion 211 membrane. The Nafion membrane was pretreated by boiling it in 5% H<sub>2</sub>O<sub>2</sub> solution for 1 h, 0.5 M H<sub>2</sub>SO<sub>4</sub> for 1 h and deionized water for 1 h in turn. Before the NORR test, all feeding gases were purified through two glass bubblers containing 4 M KOH solution and the cathodic compartment was purged with Ar for at least 30 min to remove residual oxygen[2]. During the potentiostatic testing, NO flow (99.9%, 20 mL min<sup>-1</sup>) was continuously fed to the cathodic compartment. After electrolysis for 1 h at various potentials, liquid and gas products were detected by colorimetry and gas chromatography (GC, Shimadzu GC2010), respectively[3].

### Calculations of NH<sub>3</sub> yield rate and NH<sub>3</sub>-Faradaic efficiency

$$\text{NH}_3 \text{ yield rate } (\mu\text{g h}^{-1} \text{ mg}_{\text{cat}}^{-1}) = \frac{c_{\text{NH}_3} \times V}{t \times A} \quad (1)$$

$$\text{NH}_3\text{-Faradaic efficiency (\%)} = \frac{5 \times F \times c_{\text{NH}_3} \times V}{17 \times Q} \times 100\% \quad (2)$$

where  $c_{\text{NH}_3}$  ( $\mu\text{g mL}^{-1}$ ) is the measured  $\text{NH}_3$  concentration,  $V$  (mL) is the volume of the electrolyte,  $t$  (h) is the reduction time,  $A$  ( $\text{cm}^2$ ) is the surface area of CC ( $1 \times 1 \text{ cm}^2$ ),  $F$  ( $96500 \text{ C mol}^{-1}$ ) is the Faraday constant,  $Q$  (C) is the quantity of applied electricity.

### Characterizations

Spherical aberration-corrected scanning transmission electron microscopy (AC-STEM) was performed on a Titan Themes Cubed G2 300 microscope. Transmission electron microscopy (TEM), high-resolution transmission electron microscopy (HRTEM), selected area electron diffraction (SAED) and scanning transmission electron microscopy (STEM) were performed on a Tecnai G<sup>2</sup> F20 microscope. X-ray diffraction (XRD) pattern was collected on a Rigaku D/max 2400 diffractometer. On-line differential electrochemical mass spectrometry (DEMS, QAS 100) was performed on a by QAS 100 spectrometer. The various products during the electrolysis reactions were monitored at different values of  $m/z$  ionic signals.

### Calculation details

DFT calculations within Cambridge sequential total energy package (CASTEP) code have been performed. The Perdew-Burke-Ernzerhof (PBE) generalized gradient approximation (GGA) functional was used for the exchange-correlation potential. DFT-D method was employed to calculate the van der Waals (vdW) interaction. To ensure the convergence for the total energy, all the calculations were performed using a plane-wave cutoff energy of 400 eV, and a Monkhorst-Pack grid ( $3 \times 3 \times 1$ ) was used for k-point sampling. Besides, the convergence thresholds of energy and forces were set to be  $1.0 \times 10^{-5}$  eV and  $0.02 \text{ eV \AA}^{-1}$ , respectively.  $\text{MoO}_3$  (010) was modeled by a  $4 \times 4$  supercell, and a vacuum region of  $15 \text{ \AA}$  was used to separate adjacent slabs. The amorphous  $\text{MoO}_3$  was built by relaxing the crystalline  $\text{MoO}_3$  at 500 K, and the ordered atomic arrangement could be damaged.

The free energies ( $\Delta G$ , 298 K) for each reaction were given after correction:

$$\Delta G = \Delta E + \Delta ZPE - T\Delta S \quad (3)$$

where  $\Delta E$  is the adsorption energy,  $\Delta ZPE$  is the zero-point energy difference and  $T\Delta S$

is the entropy difference between the gas phase and adsorbed state.

MD simulations were carried out using a force field type of universal. The electrolyte system was modeled by a cubic cell with placing catalyst at the center of the cell and randomly filling 1000 H<sub>2</sub>O, 50 NO, and 50 H. After geometry optimization, the MD simulations were performed in an NVT ensemble (298 K) with the total simulation time of 1 ns at a time step of 1 fs.

The radial distribution function (RDF) is calculated as

$$g(r) = \frac{dN}{4\pi\rho r^2 dr} \quad (4)$$

where  $dN$  is the amount of NO in the shell between the central particle  $r$  and  $r+dr$ ,  $\rho$  is the number density of NO and H.

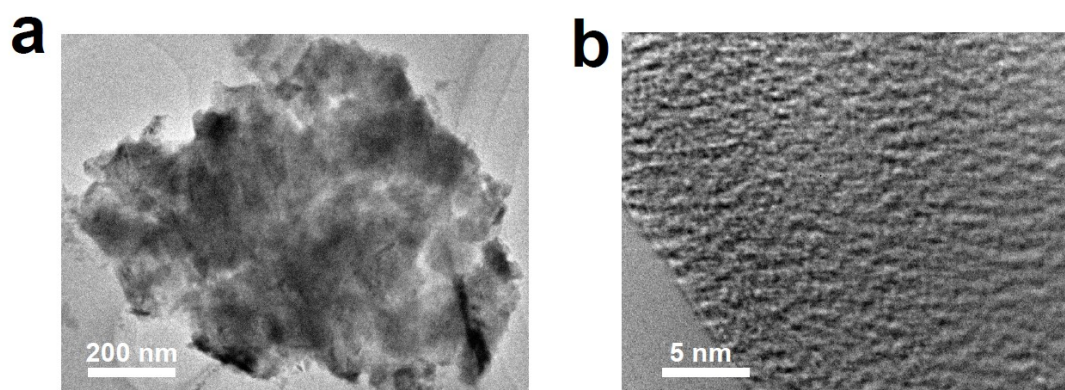

Fig. S1. (a) TEM and (b) HRTEM images of bare  $\alpha$ - $\text{MoO}_3$ .

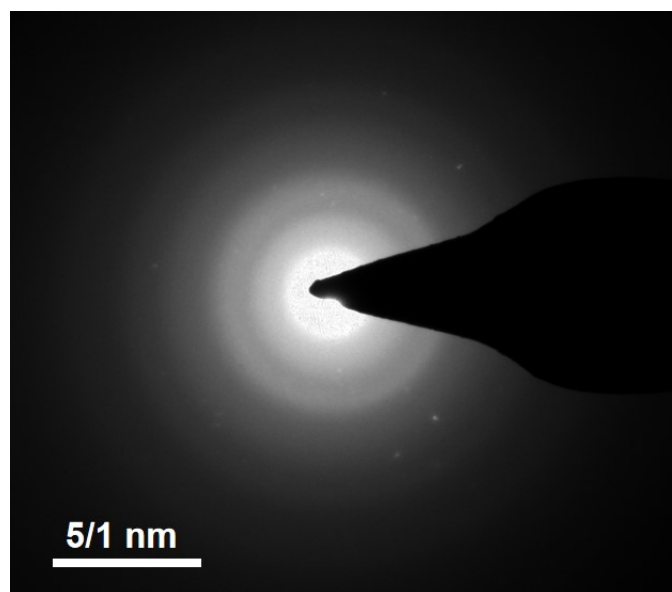

Fig. S2. SAED pattern of  $\text{In}_1/\text{a-MoO}_3$ .

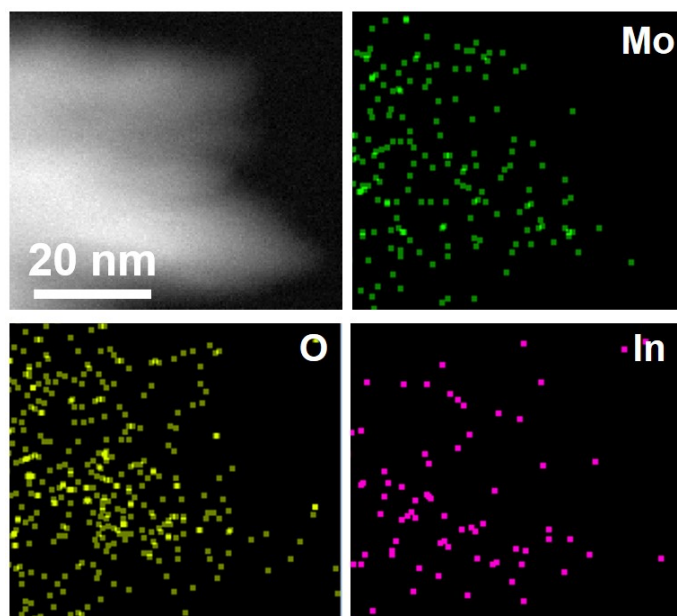

Fig. S3. STEM element mapping images of  $\text{In}_1/\text{a-MoO}_3$ .

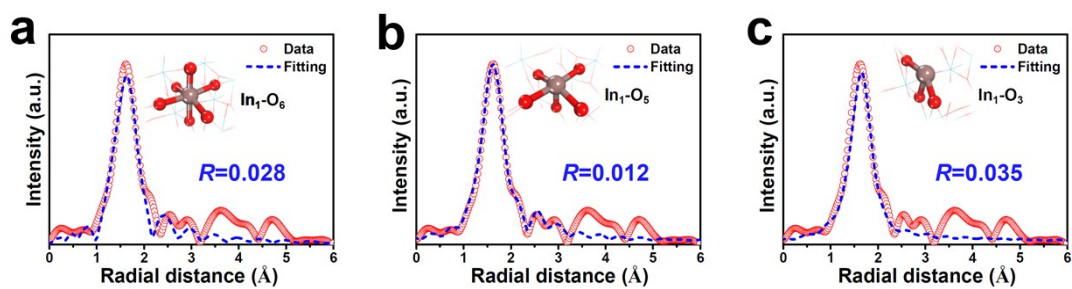

Fig. S4. EXAFS fitting curves of  $\text{In}_1/\text{a-MoO}_3$  with three possible models (a)  $\text{In}_1\text{-O}_6$ , (b)  $\text{In}_1\text{-O}_5$ , (c)  $\text{In}_1\text{-O}_3$ .

We use three most possible models ( $\text{In}_1\text{-O}_6$ ,  $\text{In}_1\text{-O}_5$  and  $\text{In}_1\text{-O}_3$ ) to conduct the EXAFS fitting of  $\text{In}_1/\text{a-MoO}_3$  (note that the models of  $\text{In}_1\text{-O}_4$ ,  $\text{In}_1\text{-O}_2$  and  $\text{In}_1\text{-O}_1$  are thermodynamic unstable). It is seen in Fig. S4 that the fitting goodness ( $R$ ) of  $\text{In}_1\text{-O}_5$  is the smallest, which means that single-atomic In is mostly likely to be coordinated with five O atoms to form  $\text{In}_1\text{-O}_5$  motif.

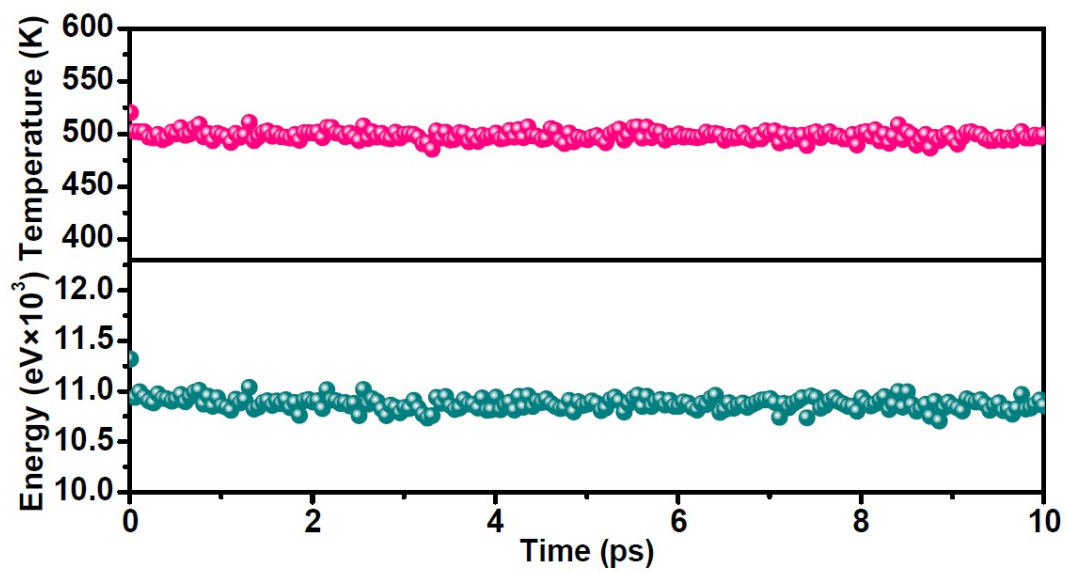

Fig. S5. Variations of energy and temperature during the ab initio molecular dynamics (AIMD) simulations for assessing the thermodynamic stability of  $\text{In}_1/\text{a-MoO}_3$ .



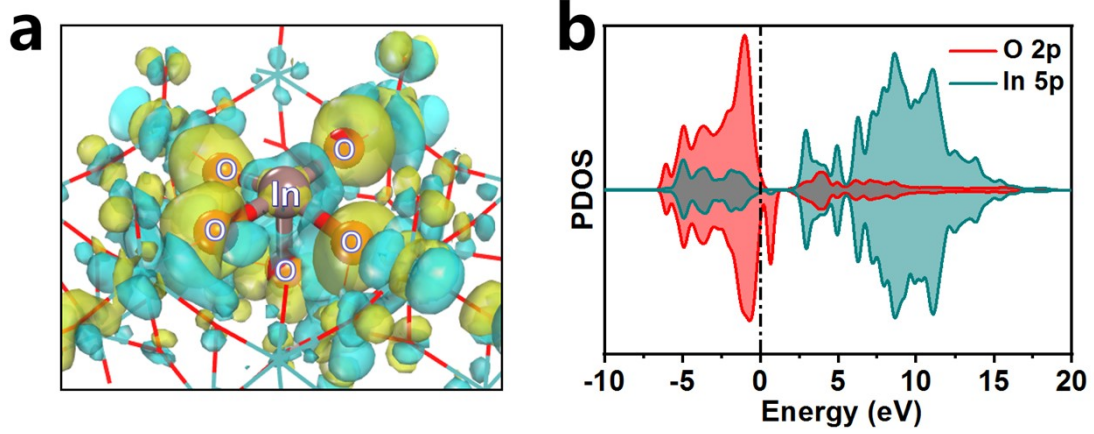

Fig. S6. (a) Charge density difference (yellow: charge accumulation, cyan: charge depletion) and (b) PDOS profile of In<sub>1</sub>-O<sub>5</sub> motif in In<sub>1</sub>/a-MoO<sub>3</sub>.

It is seen that the charge density difference (Fig. S5a) presents a strong In/O electronic interaction in In<sub>1</sub>-O<sub>5</sub> motif, and this can be further confirmed by the remarkable In/O orbital hybridization in the PDOS analysis (Fig. S5b).

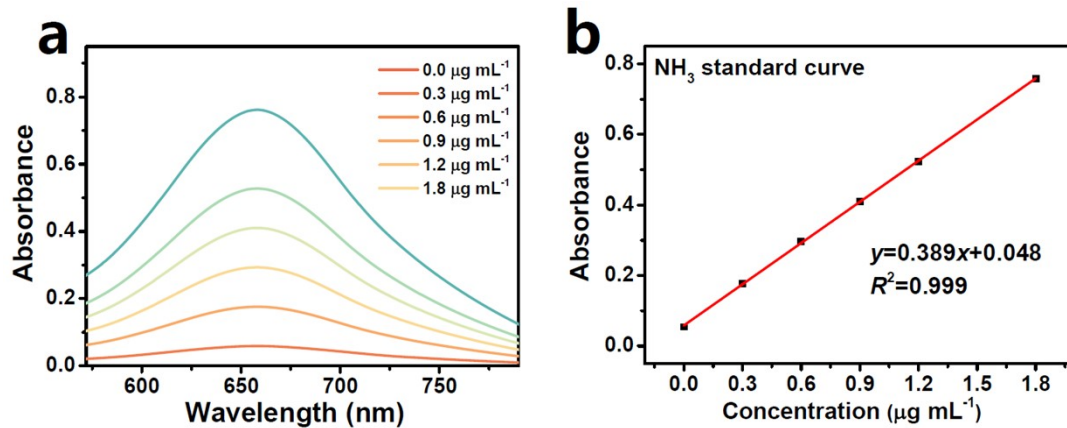

Fig. S7. (a) UV-vis absorption spectra of  $\text{NH}_4^+$  assays after incubated for 2 h at ambient conditions. (b) Calibration curve used for the calculation of  $\text{NH}_3$  concentrations.

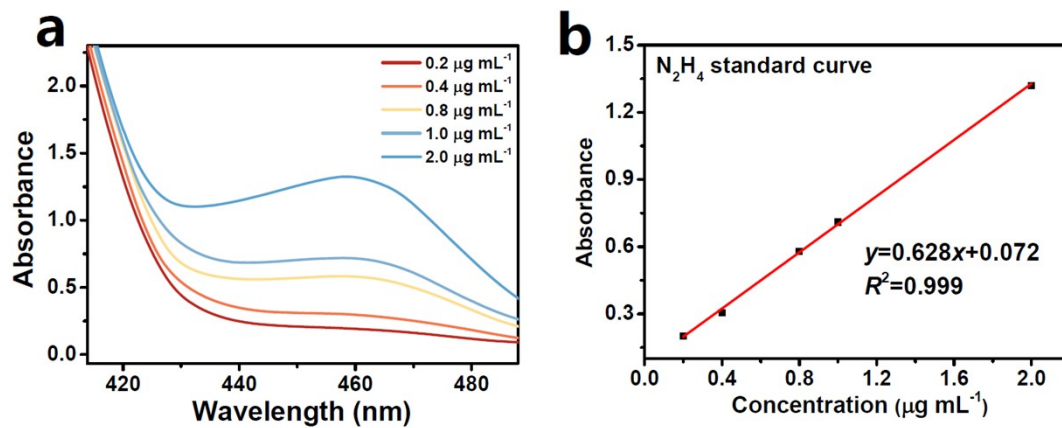

Fig. S8. (a) UV-vis absorption spectra of  $N_2H_4$  assays after incubated for 20 min at ambient conditions. (b) Calibration curve used for calculation of  $N_2H_4$  concentrations.

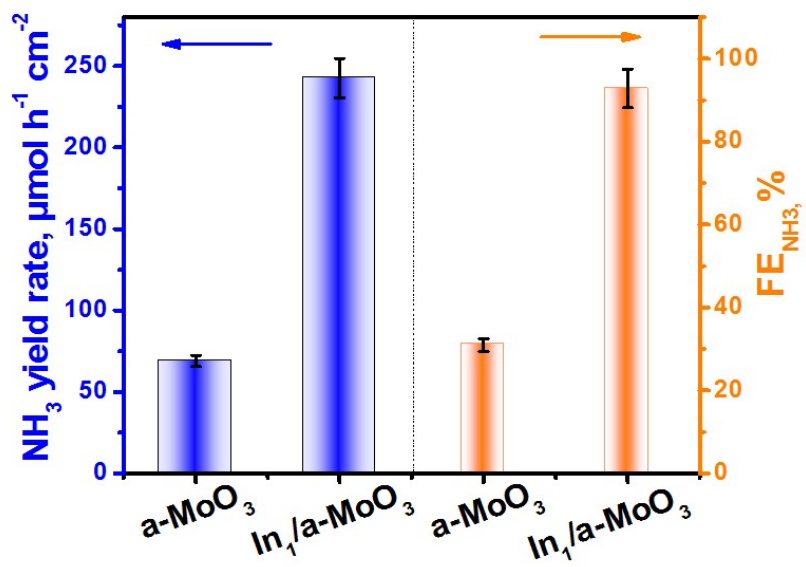

Fig. S9. Comparison of the NORR performance between bare a-MoO<sub>3</sub> and In<sub>1</sub>/a-MoO<sub>3</sub> at -0.6 V.

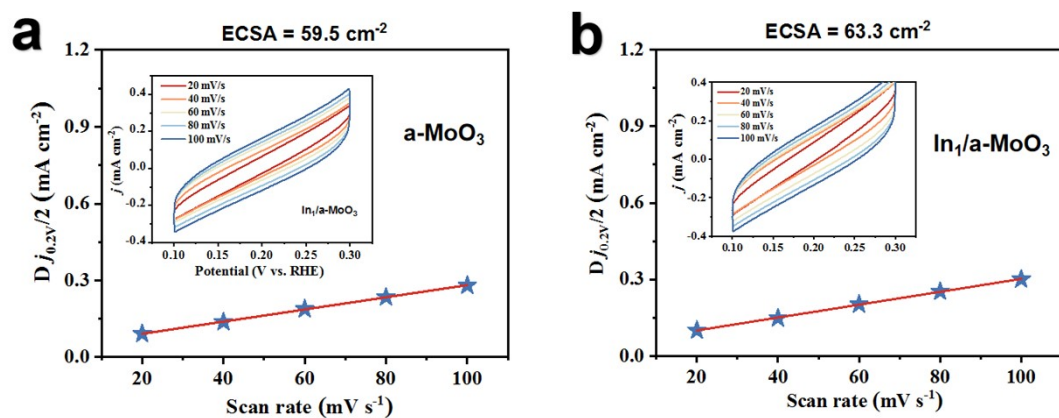

Fig. S10. CV measurements at different scanning rates and calculated ECSA values for (a) a-MoO<sub>3</sub>, (b) In<sub>1</sub>/a-MoO<sub>3</sub>.

It is seen that the electrochemically active surface area (ECSA) values are comparable between a-MoO<sub>3</sub> (59.5 cm<sup>2</sup>) and In<sub>1</sub>/a-MoO<sub>3</sub> (63.3 cm<sup>2</sup>), which means that the introduced In single atoms have little impact on the ECSA. Thus, In<sub>1</sub>/a-MoO<sub>3</sub> has an intrinsically higher NORR activity than bare a-MoO<sub>3</sub>.

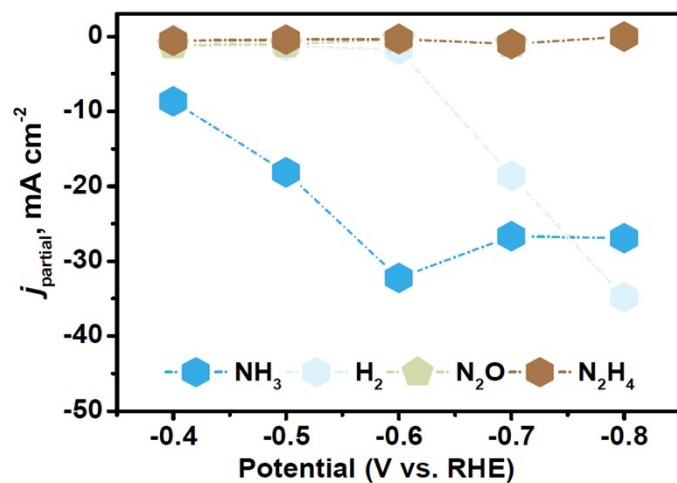

Fig. S11. Partial current densities of various products over  $\text{In}_1/\text{a-MoO}_3$  after 1 h of NORR electrolysis at different potentials.

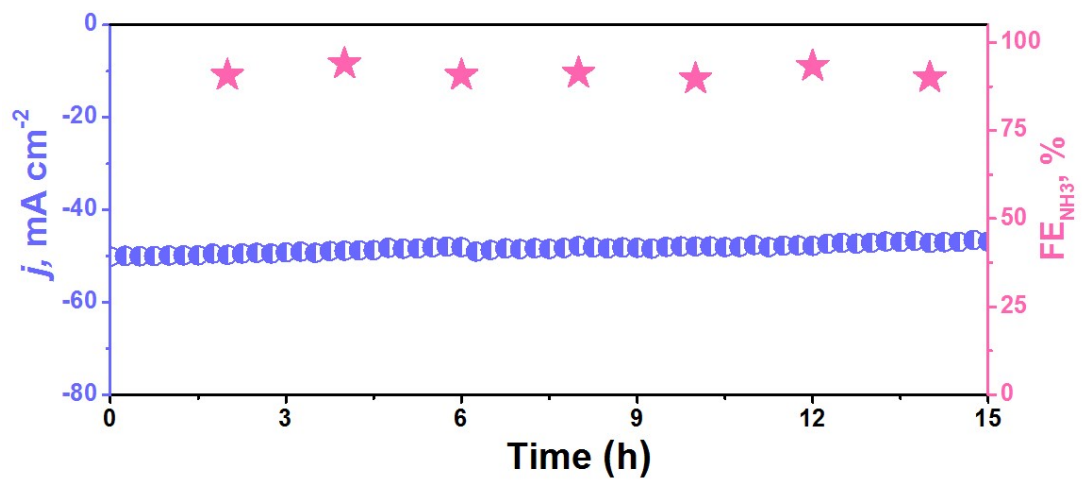

Fig. S12. Chronopotentiometric test of In<sub>1</sub>/a-MoO<sub>3</sub> for 15 h at -0.6 V.

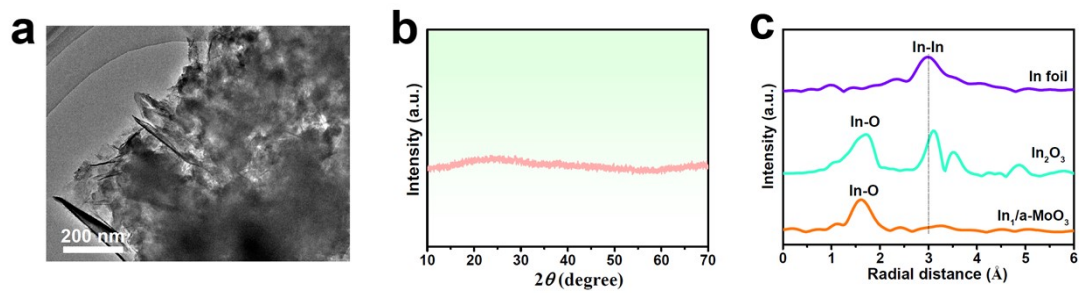

Fig. S13. (a) TEM image, (b) XRD pattern and (c) In K-edge EXAFS spectra of  $\text{In}_1/\text{a-MoO}_3$  after stability test.



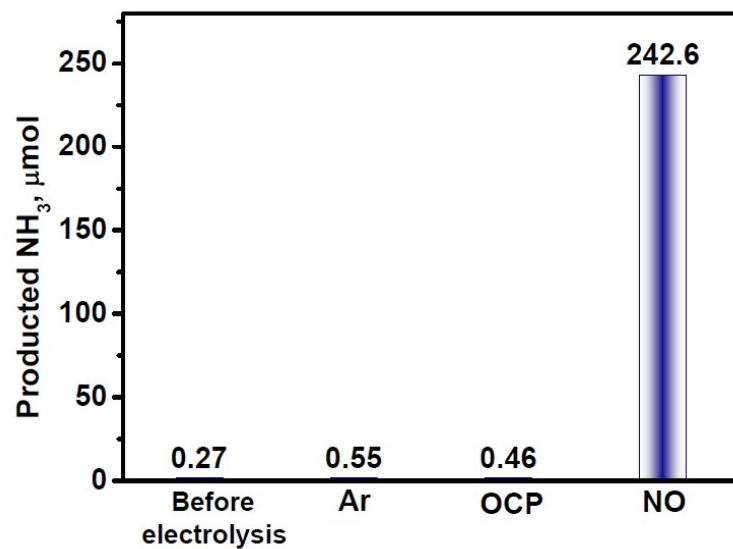

Fig. S14. Amounts of produced NH<sub>3</sub> on In<sub>1</sub>/a-MoO<sub>3</sub> under different conditions: (1) before electrolysis; (2) electrolysis on In<sub>1</sub>/a-MoO<sub>3</sub> in Ar-saturated electrolyte at -0.6 V; (3) electrolysis on In<sub>1</sub>/a-MoO<sub>3</sub> in NO-saturated electrolyte at open-circuit potential; (4) electrolysis on In<sub>1</sub>/a-MoO<sub>3</sub> in NO-saturated electrolyte at -0.6 V.

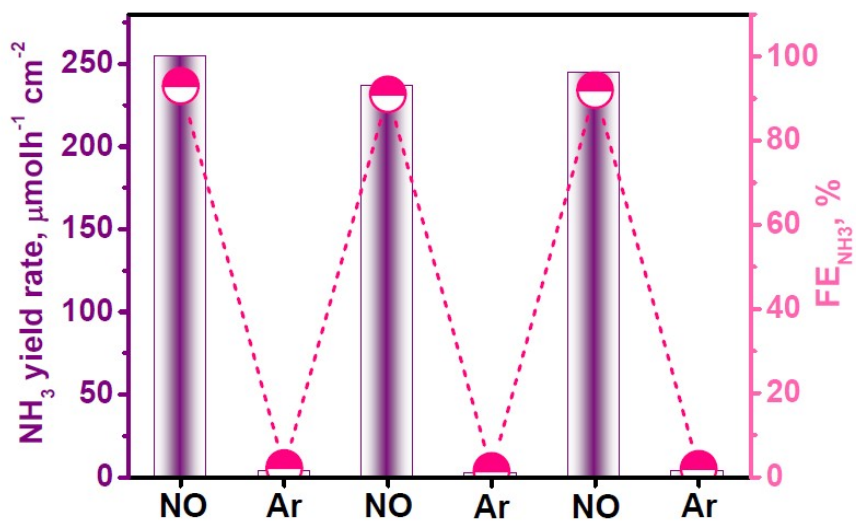

Fig. S15. NO-Ar switching test on In<sub>1</sub>/a-MoO<sub>3</sub> at -0.6 V.

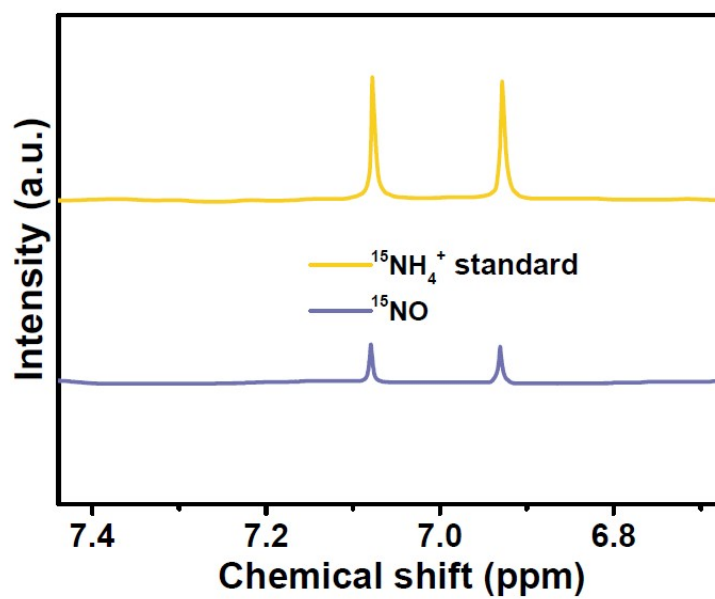

Fig. S16. <sup>1</sup>H NMR spectra of <sup>15</sup>NH<sub>4</sub><sup>+</sup> standard sample and those fed by <sup>15</sup>NO and Ar after NORR electrolysis on In<sub>1</sub>/a-MoO<sub>3</sub> at -0.6 V.

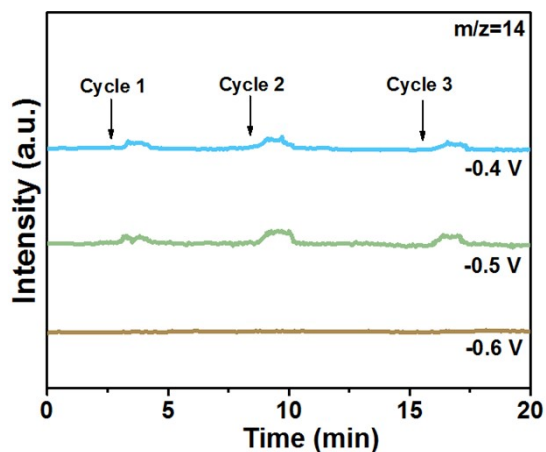

Fig. S17. Online DEMS spectra of  $\text{In}_1/\text{a-MoO}_3$  during the electrolysis at  $-0.4 \sim -0.6$  V.

It is seen that at  $-0.4$  and  $-0.5$  V, a small amount of  $*N$  intermediate is generated. These generated  $*N$  can be favorably coupled with  $*NO$  to generate  $\text{N}_2\text{O}$  by-product. However, the optimal NORR potential for our  $\text{In}_1/\text{a-MoO}_3$  is  $-0.6$  V, at which there is no  $*N$  intermediate generated, thus ruling out  $\text{N}_2\text{O}$  generation at  $-0.6$  (Fig. 3c).

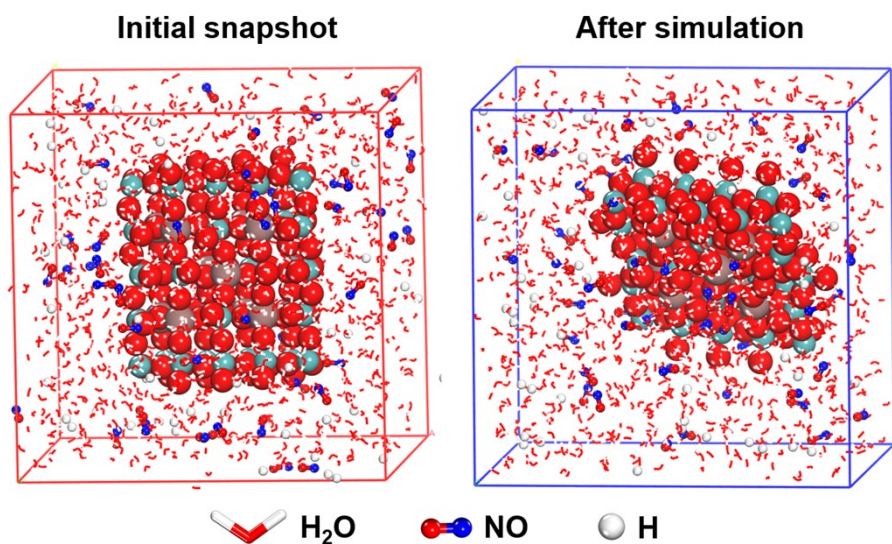

Fig. S18. Initial and simulated states of the dynamic process of NO and H adsorption on In<sub>1</sub>/a-MoO<sub>3</sub>.

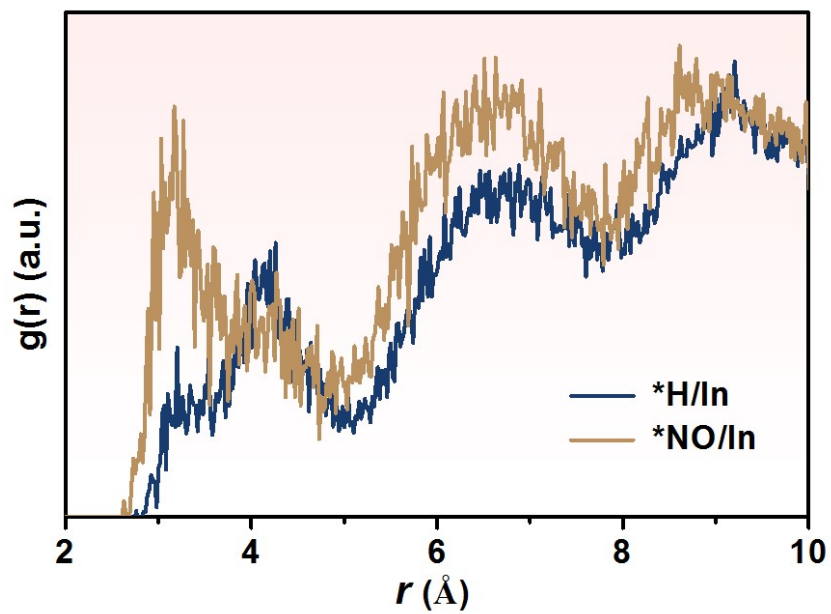

Fig. S19. RDF curves of the interactions between single-site In and \*NO/\*H.

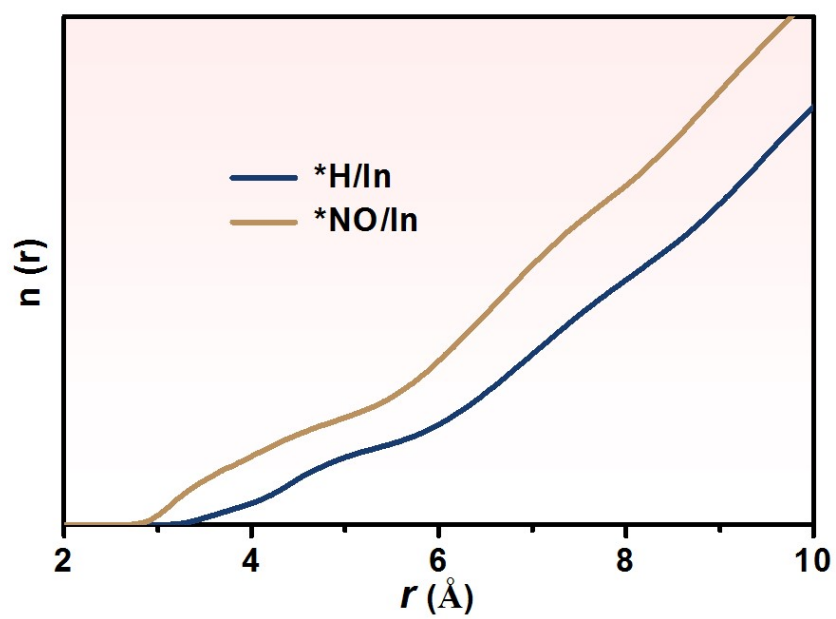

Fig. S20. Integrated RDF curves of the interactions between single-site In and  $*NO/*H$ .

Table S1. Structural parameters extracted from the In K-edge EXAFS fitting.

| Sample                              | Shell | CN  | R (Å) | $\sigma^2$ ( $10^{-3}\text{Å}^2$ ) | $\Delta E_0$ (eV) | R factor |
|-------------------------------------|-------|-----|-------|------------------------------------|-------------------|----------|
| In <sub>1</sub> /a-MoO <sub>3</sub> | In-O  | 4.8 | 2.05  | 4.8                                | 7.1               | 0.012    |

CN is the coordination number, R is interatomic distance,  $\sigma^2$  is Debye-Waller factor,  $\Delta E_0$  is edge-energy shift, R factor is used to value the goodness of the fitting.



Table S2. Comparison of the optimum NH<sub>3</sub> yield and NH<sub>3</sub>-Faradic efficiency (FE<sub>NH3</sub>) for recently reported state-of-the-art NORR electrocatalysts at ambient conditions.

| Catalyst                                           | Electrolyte                               | NH <sub>3</sub> yield rate (μmol h <sup>-1</sup> cm <sup>-2</sup> ) | FE <sub>NH3</sub> (%) | Potential (V vs. RHE) | Ref.             |
|----------------------------------------------------|-------------------------------------------|---------------------------------------------------------------------|-----------------------|-----------------------|------------------|
| Mo <sub>2</sub> C                                  | 0.5 M Na <sub>2</sub> SO <sub>4</sub>     | 122.7                                                               | 86.3                  | -0.4                  | [6]              |
| Fe <sub>1</sub> /MoS <sub>2-x</sub>                | 0.5 M Na <sub>2</sub> SO <sub>4</sub>     | 288.2                                                               | 82.5                  | -0.6                  | [7]              |
| NiO/TM                                             | 0.1 M Na <sub>2</sub> SO <sub>4</sub>     | 125.3                                                               | 90                    | -0.6                  | [8]              |
| MoC/NCS                                            | 0.1 M HCl                                 | 79.4                                                                | 89                    | -0.8                  | [9]              |
| Cu <sub>2</sub> O@CoMn <sub>2</sub> O <sub>4</sub> | 0.1 M Na <sub>2</sub> SO <sub>4</sub>     | 94.18                                                               | 75.05                 | -0.9                  | [10]             |
| CoS <sub>1-x</sub>                                 | 0.2 M Na <sub>2</sub> SO <sub>4</sub>     | 44.67                                                               | 53.62                 | -0.4                  | [11]             |
| Bi NDs                                             | 0.1 M Na <sub>2</sub> SO <sub>4</sub>     | 70.2                                                                | 89.2                  | -0.5                  | [12]             |
| Co <sub>1</sub> /MoS <sub>2</sub>                  | 0.5M Na <sub>2</sub> SO <sub>4</sub>      | 217.6                                                               | 87.7                  | -0.5                  | [13]             |
| FeP/CC                                             | 0.2 M PBS                                 | 85.62                                                               | 88.49                 | -0.2                  | [14]             |
| CoP/TM                                             | 0.2 M Na <sub>2</sub> SO <sub>4</sub>     | 47.22                                                               | 88.3                  | -0.2                  | [15]             |
| a-B <sub>2.6</sub> C@TiO <sub>2</sub> /Ti          | 0.1 M Na <sub>2</sub> SO <sub>4</sub>     | 216.4                                                               | 87.6                  | -0.9                  | [16]             |
| Ni <sub>2</sub> P/CP                               | 0.1 M HCl                                 | 33.47                                                               | 76.9                  | -0.2                  | [17]             |
| <b>In<sub>1</sub>/a-MoO<sub>3</sub></b>            | <b>0.5 M Na<sub>2</sub>SO<sub>4</sub></b> | <b>242.6</b>                                                        | <b>92.8</b>           | <b>-0.6</b>           | <b>This work</b> |

## Supplementary references

- [1]. K. Chen, Y. Zhang, J. Xiang, X. Zhao, X. Li and K. Chu, *ACS Energy Lett.*, 2023, **8**, 1281-1288.
- [2]. L. Zhang, J. Liang, Y. Wang, T. Mou, Y. Lin, L. Yue, T. Li, Q. Liu, Y. Luo, N. Li, B. Tang, Y. Liu, S. Gao, A. A. Alshehri, X. Guo, D. Ma and X. Sun, *Angew. Chem. Int. Edit.*, 2021, **60**, 25263-25268.
- [3]. K. Chen, P. Shen, N. Zhang, D. Ma and K. Chu, *Inorg. Chem.*, 2023, **62**, 653-658.
- [4]. P. Li, Z. Jin, Z. Fang and G. Yu, *Energy Environ. Sci.*, 2021, **14**, 3522-3531.
- [5]. Y. Luo, K. Chen, P. Shen, X. Li, X. Li, Y. Li and K. Chu, *J. Colloid Interf. Sci.*, 2023, **629**, 950-957.
- [6]. K. Chen, P. Shen, N. Zhang, D. Ma and K. Chu, *Inorg. Chem.*, 2023, DOI: 10.1021/acs.inorgchem.2c03714.
- [7]. K. Chen, J. Wang, J. Kang, X. Lu, X. Zhao and K. Chu, *Appl. Catal. B*, 2023, **324**, 122241.
- [8]. P. Liu, J. Liang, J. Wang, L. Zhang, J. Li, L. Yue, Y. Ren, T. Li, Y. Luo, N. Li, B. Tang, Q. Liu, A. M. Asiri, Q. Kong and X. Sun, *Chem. Commun.*, 2021, **57**, 13562-13565.
- [9]. G. Meng, M. Jin, T. Wei, Q. Liu, S. Zhang, X. Peng, J. Luo and X. Liu, *Nano Res.*, 2022, **15**, 8890-8896.
- [10]. C. Bai, S. Fan, X. Li, Z. Niu, J. Wang, Z. Liu and D. Zhang, *Adv. Funct. Mater.*, 2022, **32**, 2205569.
- [11]. L. Zhang, Q. Zhou, J. Liang, L. Yue, T. Li, Y. Luo, Q. Liu, N. Li, B. Tang, F. Gong, X. Guo and X. Sun, *Inorg. Chem.*, 2022, **61**, 8096-8102.
- [12]. Y. Lin, J. Liang, H. Li, L. Zhang, T. Mou, T. Li, L. Yue, Y. Ji, Q. Liu, Y. Luo, N. Li, B. Tang, Q. Wu, M. S. Hamdy, D. Ma and X. Sun, *Mater. Today Phys.*, 2022, **22**.
- [13]. X. Li, K. Chen, X. Lu, D. Ma and K. Chu, *Chem. Eng. J.*, 2023, **454**, 140333.
- [14]. J. Liang, Q. Zhou, T. Mou, H. Chen, L. Yue, Y. Luo, Q. Liu, M. S. Hamdy, A. A. Alshehri, F. Gong and X. Sun, *Nano Res.*, 2022, **15**, 4008-4013.
- [15]. J. Liang, W.-F. Hu, B. Song, T. Mou, L. Zhang, Y. Luo, Q. Liu, A. A. Alshehri, M. S. Hamdy, L.-M. Yang and X. Sun, *Inorg. Chem. Front.*, 2022, **9**, 1366-1372.
- [16]. J. Liang, P. Liu, Q. Li, T. Li, L. Yue, Y. Luo, Q. Liu, N. Li, B. Tang, A. A. Alshehri, I. Shakir, P. O. Agboola, C. Sun and X. Sun, *Angew. Chem. Int. Ed.*, 2022, **61**, e202202087.
- [17]. T. Mou, J. Liang, Z. Ma, L. Zhang, Y. Lin, T. Li, Q. Liu, Y. Luo, Y. Liu, S. Gao, H. Zhao, A. M. Asiri, D. Ma and X. Sun, *J. Mater. Chem. A*, 2021, **9**, 24268-24275.
